# Supplementary material for: Temporal Patterns of Happiness and Information in a Global Social Network: Hedonometrics and Twitter
Source: PubMed Central journal article supplement (PMC3233600; doi:10.1371/journal.pone.0026752), 2011-12-07
Supplement: pone.0026752.s054.pdf [file pone.0026752.s054.pdf]

| Word                | $h_{\text{avg}}^{(\text{norm})}$ | Total Tweets  | $h_{\text{avg}}^{(\text{amb})}$ | Word                | $h_{\text{avg}}^{(\text{norm})}$ | Total Tweets   | $h_{\text{avg}}^{(\text{amb})}$ |
|---------------------|----------------------------------|---------------|---------------------------------|---------------------|----------------------------------|----------------|---------------------------------|
| 1. happy            | +1.104                           | 1.65e+07 (13) | +0.430 (1)                      | 51. climate         | -0.160                           | 3.64e+05 (80)  | -0.135 (64)                     |
| 2. love             | +0.977                           | 4.67e+07 (6)  | +0.164 (11)                     | 52. man             | -0.163                           | 1.59e+07 (14)  | -0.175 (71)                     |
| 3. Christmas        | +0.953                           | 4.89e+06 (35) | +0.404 (2)                      | 53. yesterday       | -0.168                           | 3.08e+06 (42)  | +0.033 (37)                     |
| 4. win              | +0.924                           | 7.98e+06 (26) | +0.204 (8)                      | 54. hot             | -0.172                           | 7.12e+06 (28)  | +0.095 (26)                     |
| 5. vacation         | +0.817                           | 9.35e+05 (67) | +0.200 (9)                      | 55. Obama           | -0.173                           | 2.98e+06 (44)  | -0.205 (76)                     |
| 6. sun              | +0.737                           | 2.39e+06 (52) | +0.144 (16)                     | 56. work            | -0.174                           | 1.84e+07 (11)  | -0.010 (46)                     |
| 7. family           | +0.716                           | 5.01e+06 (32) | +0.251 (5)                      | 57. commute         | -0.206                           | 9.01e+04 (94)  | -0.048 (50)                     |
| 8. friends          | +0.685                           | 7.67e+06 (27) | +0.155 (12)                     | 58. they            | -0.208                           | 2.74e+07 (8)   | -0.159 (67)                     |
| 9. party            | +0.679                           | 6.44e+06 (29) | +0.170 (10)                     | 59. Michael Jackson | -0.213                           | 8.26e+05 (70)  | +0.018 (41)                     |
| 10. heaven          | +0.674                           | 7.42e+05 (71) | +0.041 (34)                     | 60. them            | -0.280                           | 1.54e+07 (15)  | -0.090 (55)                     |
| 11. kiss            | +0.632                           | 1.70e+06 (59) | +0.072 (30)                     | 61. election        | -0.306                           | 5.60e+05 (75)  | -0.127 (60)                     |
| 12. :)              | +0.630                           | 1.04e+07 (20) | +0.274 (4)                      | 62. Pope            | -0.316                           | 1.52e+05 (91)  | -0.277 (83)                     |
| 13. income          | +0.621                           | 5.10e+05 (76) | +0.137 (17)                     | 63. left            | -0.383                           | 4.89e+06 (34)  | -0.118 (58)                     |
| 14. cash            | +0.601                           | 1.28e+06 (63) | +0.146 (15)                     | 64. Democrat        | -0.384                           | 9.32e+04 (93)  | -0.226 (77)                     |
| 15. Valentine       | +0.593                           | 2.47e+05 (84) | +0.127 (20)                     | 65. oil             | -0.411                           | 1.38e+06 (62)  | -0.162 (68)                     |
| 16. :-)             | +0.560                           | 1.67e+06 (60) | +0.228 (6)                      | 66. RT              | -0.443                           | 3.39e+08 (1)   | +0.028 (40)                     |
| 17. sex             | +0.542                           | 3.55e+06 (39) | -0.008 (45)                     | 67. gas             | -0.471                           | 1.02e+06 (65)  | -0.193 (74)                     |
| 18. coffee          | +0.518                           | 2.80e+06 (46) | +0.147 (14)                     | 68. ?               | -0.503                           | 2.32e+06 (53)  | +0.030 (39)                     |
| 19. hope            | +0.515                           | 1.18e+07 (18) | +0.149 (13)                     | 69. economy         | -0.525                           | 6.09e+05 (73)  | -0.203 (75)                     |
| 20. God             | +0.468                           | 8.58e+06 (25) | +0.099 (25)                     | 70. Republican      | -0.539                           | 2.30e+05 (86)  | -0.181 (72)                     |
| 21. health          | +0.447                           | 2.58e+06 (50) | -0.000 (44)                     | 71. cold            | -0.546                           | 3.67e+06 (36)  | -0.162 (69)                     |
| 22. life            | +0.422                           | 1.40e+07 (17) | +0.012 (43)                     | 72. gay             | -0.552                           | 2.73e+06 (47)  | -0.152 (65)                     |
| 23. ;-)             | +0.395                           | 9.39e+05 (66) | +0.041 (35)                     | 73. Muslim          | -0.569                           | 2.15e+05 (88)  | -0.262 (81)                     |
| 24. girl            | +0.331                           | 1.01e+07 (22) | -0.010 (47)                     | 74. Congress        | -0.580                           | 3.92e+05 (79)  | -0.231 (78)                     |
| 25. :)              | +0.326                           | 2.61e+06 (48) | +0.094 (27)                     | 75. Senate          | -0.601                           | 4.48e+05 (78)  | -0.340 (90)                     |
| 26. USA             | +0.325                           | 2.16e+06 (54) | +0.113 (22)                     | 76. Sarah Palin     | -0.681                           | 2.26e+05 (87)  | -0.128 (61)                     |
| 27. yes             | +0.321                           | 1.16e+07 (19) | +0.056 (31)                     | 77. mosque          | -0.694                           | 6.98e+04 (95)  | -0.709 (98)                     |
| 28. Jesus           | +0.247                           | 2.03e+06 (56) | +0.094 (28)                     | 78. Islam           | -0.710                           | 1.87e+05 (89)  | -0.299 (86)                     |
| 29. summer          | +0.221                           | 3.00e+06 (43) | +0.135 (18)                     | 79. Lehman Brothers | -0.721                           | 8.50e+03 (100) | -0.078 (54)                     |
| 30. woman           | +0.202                           | 2.54e+06 (51) | -0.115 (57)                     | 80. George Bush     | -0.747                           | 3.23e+04 (98)  | -0.333 (87)                     |
| 31. !               | +0.195                           | 3.44e+06 (40) | +0.106 (23)                     | 81. dark            | -0.766                           | 1.58e+06 (61)  | +0.031 (38)                     |
| 32. me              | +0.160                           | 1.44e+08 (4)  | -0.119 (59)                     | 82. Glenn Beck      | -0.776                           | 1.14e+05 (92)  | -0.282 (85)                     |
| 33. our             | +0.159                           | 1.41e+07 (16) | +0.207 (7)                      | 83. BP              | -0.902                           | 5.82e+05 (74)  | -0.355 (91)                     |
| 34. we              | +0.146                           | 3.91e+07 (7)  | +0.035 (36)                     | 84. Goldman Sachs   | -0.984                           | 5.27e+04 (96)  | -0.337 (88)                     |
| 35. right           | +0.126                           | 1.92e+07 (10) | -0.090 (56)                     | 85. :-(             | -1.174                           | 3.40e+05 (81)  | -0.455 (95)                     |
| 36. today           | +0.126                           | 2.56e+07 (9)  | +0.092 (29)                     | 86. lose            | -1.181                           | 2.06e+06 (55)  | -0.157 (66)                     |
| 37. you             | +0.111                           | 1.73e+08 (3)  | +0.052 (33)                     | 87. Iraq            | -1.282                           | 2.39e+05 (85)  | -0.773 (100)                    |
| 38. tomorrow        | +0.086                           | 1.04e+07 (21) | +0.054 (32)                     | 88. :(              | -1.288                           | 2.89e+06 (45)  | -0.472 (96)                     |
| 39. snow            | +0.083                           | 2.60e+06 (49) | -0.051 (51)                     | 89. sad             | -1.366                           | 3.56e+06 (38)  | -0.187 (73)                     |
| 40. night           | +0.074                           | 1.71e+07 (12) | +0.014 (42)                     | 90. no              | -1.415                           | 9.51e+07 (5)   | -0.132 (62)                     |
| 41. boy             | +0.062                           | 4.93e+06 (33) | -0.026 (48)                     | 91. drugs           | -1.452                           | 5.10e+05 (77)  | -0.382 (93)                     |
| 42. school          | +0.050                           | 9.26e+06 (24) | -0.056 (53)                     | 92. Afghanistan     | -1.458                           | 2.74e+05 (83)  | -0.703 (97)                     |
| 43. winter          | +0.050                           | 1.26e+06 (64) | +0.101 (24)                     | 93. gun             | -1.476                           | 6.81e+05 (72)  | -0.367 (92)                     |
| 44. rain            | +0.050                           | 3.23e+06 (41) | -0.134 (63)                     | 94. hate            | -1.520                           | 9.65e+06 (23)  | -0.282 (84)                     |
| 45. Stephen Colbert | +0.001                           | 2.38e+04 (99) | +0.126 (21)                     | 95. depressed       | -1.541                           | 2.81e+05 (82)  | -0.339 (89)                     |
| 46. vegan           | -0.015                           | 1.84e+05 (90) | +0.315 (3)                      | 96. hell            | -1.551                           | 6.27e+06 (30)  | -0.250 (79)                     |
| 47. church          | -0.016                           | 1.81e+06 (58) | +0.131 (19)                     | 97. sick            | -1.630                           | 3.58e+06 (37)  | -0.262 (80)                     |
| 48. Jon Stewart     | -0.024                           | 5.21e+04 (97) | -0.052 (52)                     | 98. headache        | -1.881                           | 8.57e+05 (69)  | -0.437 (94)                     |
| 49. I               | -0.062                           | 3.08e+08 (2)  | -0.048 (49)                     | 99. flu             | -1.912                           | 9.01e+05 (68)  | -0.735 (99)                     |
| 50. I feel          | -0.129                           | 5.17e+06 (31) | -0.173 (70)                     | 100. war            | -2.040                           | 1.96e+06 (57)  | -0.270 (82)                     |

TABLE S1: The same selection of 100 keywords and text elements listed in the main text's Tab. 2, reordered by normalized happiness  $h_{\text{avg}}^{(\text{norm})}$ .
